# Supplementary material
Source: PubMed Central journal article supplement (PMC3638920)
Supplement: NIHMS398988-supplement-Table_02.pdf [file NIHMS398988-supplement-Table_02.pdf]

**Table S2. Yeast Strains and Plasmids Used in This Study, Related to Experimental Procedures**

| <b>Yeast Strains</b> |              |                                                                                                                                 |                                |
|----------------------|--------------|---------------------------------------------------------------------------------------------------------------------------------|--------------------------------|
| <b>Strain</b>        | <b>Alias</b> | <b>Genotype</b>                                                                                                                 | <b>Reference</b>               |
| BY4741               |              | <i>met15Δ0, his3Δ1, ura3Δ0, leu2Δ0</i>                                                                                          | (Brachmann et al., 1998)       |
| PJ-4a                |              | <i>MAT a trp1-Δ1 leu2-3,112 ura3-52 his3-200 gal4Δ gal80Δ GAL2-ADE2 LYS2::GAL1-HIS3 met2::GAL7-lacZ</i>                         | (James et al., 1996)           |
| RGY311               | UCC6184      | RGY379<br><i>ubp10Δ::KanMX::ubp10<sup>C371S</sup>-MT6::URA3</i>                                                                 | (Gardner et al., 2005)         |
| RGY312               | UCC6185      | RGY379<br><i>ubp10Δ::KanMX::ubp10<sup>Δ94-250</sup>-MT6::URA3</i>                                                               | (Gardner et al., 2005)         |
| RGY313               | UCC6186      | RGY379<br><i>ubp10Δ::KanMX::UBP10-MT6::URA3</i>                                                                                 | (Gardner et al., 2005)         |
| RGY375               | UCC6195      | <i>HMLa Mata HMRA cdc7-1 bar1 trp1-289 ura3-52 leu2-3,112 his6 HTAI-FLAG-HTB1</i>                                               | (Gardner et al., 2005)         |
| RGY376               | UCC6196      | RGY375 <i>sir2Δ::LEU2</i>                                                                                                       | (Gardner et al., 2005)         |
| RGY377               | UCC6197      | RGY375 <i>sir3Δ::LEU2</i>                                                                                                       | (Gardner et al., 2005)         |
| RGY378               | UCC6198      | RGY375 <i>sir4Δ::LEU2</i>                                                                                                       | (Gardner et al., 2005)         |
| RGY379               | UCC6199      | RGY375 <i>ubp10Δ::KanMX</i>                                                                                                     | (Gardner et al., 2005)         |
| RGY1221              |              | BY4741 <i>trp1Δ::LEU2</i>                                                                                                       |                                |
| RGY1593              |              | <i>MAT a /α ura3-52/ura3-52 lys2-801amber/+ ade2-101ochre/+ trp1-Δ63/+ his3-Δ200/+ leu2-Δ1/+ DOT4-GFP-KanMX/+ Nop58-dsRED/+</i> | (Kahana and Gottschling, 1999) |
| RGY4595              |              | RGY1221 <i>ubp10Δ::NatMX</i>                                                                                                    |                                |
| RGY4625              |              | RGY1221 <i>NOP56-3HA::KanMX</i>                                                                                                 |                                |
| RGY4626              |              | RGY1221 <i>NOP58-3HA::KanMX</i>                                                                                                 |                                |
| RGY4627              |              | RGY1221 <i>PWP2-3HA::KanMX</i>                                                                                                  |                                |
| RGY4653              |              | <i>RPA190-3HA::KanMX, all ubiquitin genes 8XHistidine tagged</i>                                                                |                                |
| RGY4668              |              | RGY4595<br><i>ubp10Δ::NatMX::UBP10-</i>                                                                                         |                                |

|                 |                   |                                                                                                                |                        |
|-----------------|-------------------|----------------------------------------------------------------------------------------------------------------|------------------------|
|                 |                   | <i>3HSV::TRP1</i>                                                                                              |                        |
| RGY4671         |                   | RGY1221 <i>CBF5-3HA::KanMX</i>                                                                                 |                        |
| RGY4696         |                   | RGY4625 <i>ubp10Δ::NatMX</i>                                                                                   |                        |
| RGY4697         |                   | RGY4626 <i>ubp10Δ::NatMX</i>                                                                                   |                        |
| RGY4698         |                   | RGY4627 <i>ubp10Δ::NatMX</i>                                                                                   |                        |
| RGY4709         |                   | RGY4671 <i>ubp10Δ::NatMX</i>                                                                                   |                        |
| RGY4728         |                   | RGY4653 <i>ubp10Δ::NatMX</i>                                                                                   |                        |
| RGY4742         |                   | RGY1221 <i>RPA190-3HA::KanMX</i>                                                                               |                        |
| RGY4750         |                   | RGY4742 <i>ubp10Δ::NatMX</i>                                                                                   |                        |
| RGY4803         |                   | <i>RPA190-3HA::KanMX, ubp10Δ::NatMX, UBP10-3HSV::TRP1</i>                                                      |                        |
| RGY5045         |                   | RGY4750 <i>P<sub>UBP10</sub><sup>-</sup> USP36::URA3 (2μ plasmid)</i>                                          |                        |
| RGY5101         |                   | BY4741 <i>SIR4-GFP::URA3 NOP58-dsRED::NatMX</i>                                                                |                        |
| RGY5114         |                   | PJ-4a <i>GAD::LEU2 (2μ plasmid) GBD-UBP10<sup>C371S</sup>::TRP1 (YE<sub>p</sub>)</i>                           |                        |
| RGY5115         |                   | PJ-4a <i>GAD-DHR2::LEU2 (2μ plasmid) GBD-UBP10<sup>C371S</sup>::TRP1 (YE<sub>p</sub>)</i>                      |                        |
| RGY5116         |                   | PJ-4a <i>GAD-UTP22::LEU2 (2μ plasmid) GBD-UBP10<sup>C371S</sup>::TRP1 (YE<sub>p</sub>)</i>                     |                        |
| RGY5117         |                   | PJ-4a <i>GAD-SIR4<sup>(612-1358)</sup>::LEU2 (2μ plasmid) GBD-UBP10<sup>C371S</sup>::TRP1 (YE<sub>p</sub>)</i> |                        |
| RGY5118         |                   | RGY4742 <i>RPA190-3HA::TRP1 (2μ plasmid)</i>                                                                   |                        |
| RGY5119         |                   | RGY4750 <i>RPA190-3HA::TRP1 (2μ plasmid)</i>                                                                   |                        |
|                 |                   | RGY4728 <i>P<sub>UBP10</sub><sup>-</sup> USP36::URA3 (2μ plasmid)</i>                                          |                        |
| <b>Plasmids</b> |                   |                                                                                                                |                        |
| <b>Plasmids</b> |                   | <b>Relevant genes</b>                                                                                          | <b>Reference</b>       |
| pRG67           |                   | <i>trp1Δ::LEU2</i>                                                                                             |                        |
| pRG116          |                   | <i>LEU2 2μ pACT-GW-attR</i>                                                                                    |                        |
| pRG616          | pRS306-str4-1-MT6 | <i>URA3 INT ubp10<sup>C371S</sup>-MT6</i>                                                                      | (Gardner et al., 2005) |
| pRG617          | pRS306-str4-5-MT6 | <i>URA3 INT ubp10<sup>A94-250</sup>-MT6</i>                                                                    | (Gardner et al., 2005) |
| pRG637          |                   | <i>URA3 INT STR4/DOT4-6Myc</i>                                                                                 | (Gardner et al., 2005) |
| pRG898          |                   | <i>TRP1 YE<sub>p</sub> Gal4BD-UBP10<sup>C371S</sup></i>                                                        |                        |
| pRG1332         |                   | <i>LEU2 2μ Gal4AD-Sir4<sup>(612-1358)</sup></i>                                                                |                        |
| pRG1337         |                   | <i>NatMX INT NOP58-dsRed</i>                                                                                   |                        |

|         |  |                                                       |  |
|---------|--|-------------------------------------------------------|--|
| pRG1738 |  | <i>TRP1 INT UBP10-3HSV</i>                            |  |
| pRG2490 |  | <i>LEU2 2<math>\mu</math> pACT-GW-t-DHR2</i>          |  |
| pRG3232 |  | <i>TRP1 2<math>\mu</math> RPA190-3HA</i>              |  |
| pRG3351 |  | <i>LEU2 2<math>\mu</math> pACT-GW-t-UTP10</i>         |  |
| pRG3352 |  | <i>LEU2 2<math>\mu</math> pACT-GW-t-UTP22</i>         |  |
| pRG3410 |  | <i>URA3 INT SIR4-GFP</i>                              |  |
| pRG3421 |  | <i>URA3 2<math>\mu</math> P<sub>UBP10</sub>-USP36</i> |  |
